# Supplementary material for: “Click” functionalization of dual stimuli-responsive polymer nanocapsules for drug delivery systems
Source: Royal Society of Chemistry journal article supplement (doi:10.1039/c7py00161d), 2017-01-01
Supplement: c7py00161d1.pdf [file c7py00161d1.pdf]

## **Electronic Supplementary Material**

### **“Click” Functionalization of Dual Stimuli-responsive Polymer Nanocapsules for Drug Delivery System**

Wen Jing Yang, Tingting Zhao, Peng Zhou, Simou Chen, Yu Gao, Lijun Liang,  
Xiaodong Wang, Lianhui Wang\*

Key Laboratory for Organic Electronics and Information Displays  
Institute of Advanced Materials (IAM)  
Jiangsu National Synergistic Innovation Center for Advanced Materials (SICAM)  
Nanjing University of Posts & Telecommunications  
9 Wenyuan Road, Nanjing, 210023, China

\*To whom correspondence should be addressed  
Email address: iamlhwang@njupt.edu.cn

**1. GPC curves of the degraded polymers from P(NIPAAm-*co*-PMA) nanocapsules and FA-Nanocapsules in the presence of DTT**

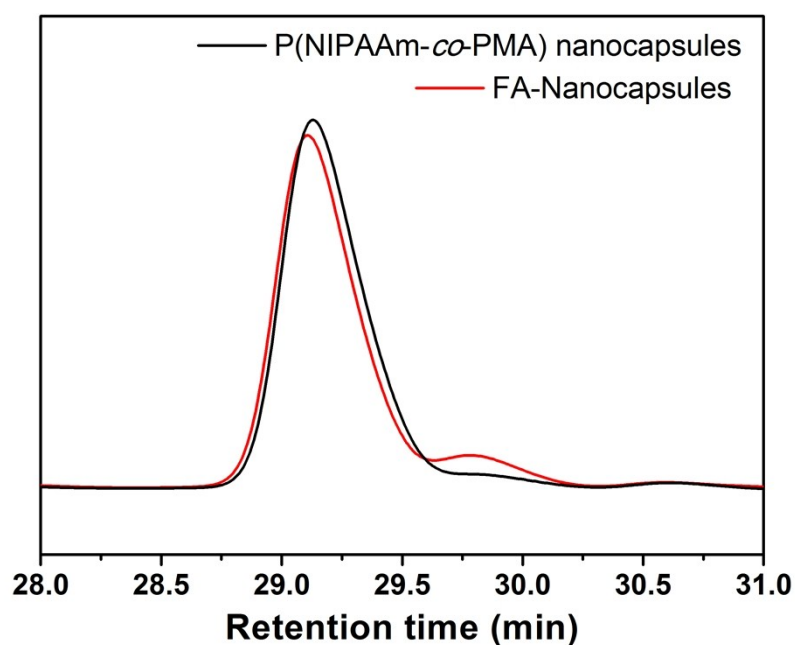

**Figure S1** GPC curves of the degraded polymers from P(NIPAAm-*co*-PMA) nanocapsules and FA-Nanocapsules in the presence of DTT

**2. Hydrodynamic diameter and size distribution of P(NIPAAm-*co*-PMA) nanocapsules under different environmental temperatures**

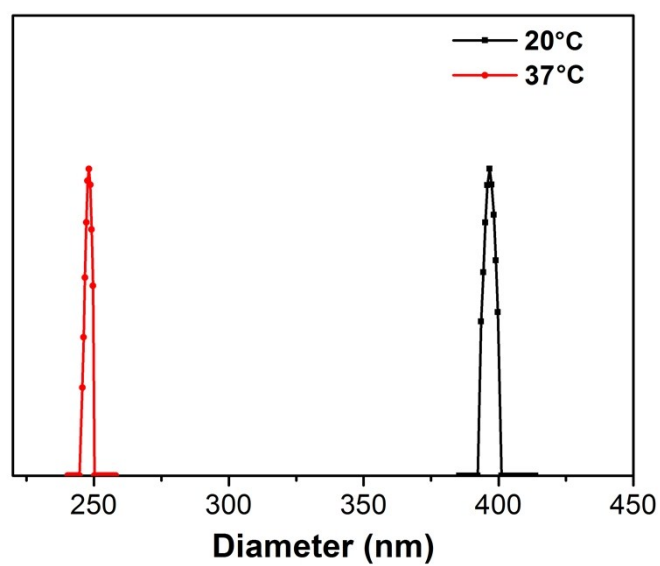

**Figure S2** Hydrodynamic diameter and size distribution of P(NIPAAm-*co*-PMA) nanocapsules under different environmental temperatures (20°C and 37°C)
